# Supplementary material
Source: PubMed Central journal article supplement (PMC8489877)
Supplement: mmc1.pdf [file mmc1.pdf]

# THE LANCET

## **Supplementary appendix**

This appendix formed part of the original submission. We post it as supplied by the authors.

Supplement to: Predecki M, Thomson T, Clarke CL, et al. Immunological responses to SARS-CoV-2 vaccines in kidney transplant recipients. *Lancet* 2021; published online Oct 4. [http://dx.doi.org/10.1016/S0140-6736\(21\)02096-1](http://dx.doi.org/10.1016/S0140-6736(21)02096-1).

## Contents

|                                                                                                                                                                          |           |
|--------------------------------------------------------------------------------------------------------------------------------------------------------------------------|-----------|
| Table S1. Clinical characteristics of the main cohort and subgroup of patients who had cellular responses assessed. ....                                                 | 2         |
| Table S2. Demographic characteristics of HCW comparator cohort .....                                                                                                     | 4         |
| Table S3. Clinical characteristics associated with seroconversion following SARS-CoV-2 vaccination in 768 infection-naïve kidney transplant recipients.....              | 5         |
| Table S4. Comparison of clinical characteristics of infection-naïve patients receiving ChAdOx1 versus BNT162b2 vaccines.....                                             | 7         |
| Table S5. Clinical characteristics associated with seroconversion in 358 infection-naïve patients receiving ChAdOx1 .....                                                | 9         |
| Table S6. Clinical characteristics associated with seroconversion in 410 infection-naïve patients receiving BNT162b2 .....                                               | 10        |
| Table S7. Clinical characteristics associated with seroconversion in 768 infection-naïve patients receiving a SARS-CoV-2 vaccine .....                                   | 11        |
| Table S8. Characteristics of infection-naïve patients undergoing assessment of serological and cellular responses by vaccine type.....                                   | 12        |
| <b>Table S9. Analysis of clinical characteristics associated with detectable T-cell responses in infection-naïve patients after the first-year post-transplant .....</b> | <b>13</b> |
| Table S10. Characteristics associated with lack of detectable immunological (serological and T-cell) response in 79 infection-naïve transplant patients.....             | 14        |
| Figure S1. Correlation between anti-S concentrations and clinical characteristics in infection-naïve patients.....                                                       | 15        |
| Figure S2. Correlation between anti-S concentrations and diagnostic characteristics in patients with prior infection.....                                                | 17        |
| <b>Figure S3. Immunological responses to SARS-CoV-2 vaccination in 106 kidney transplant recipients who underwent paired serological and T cell assessments .....</b>    | <b>18</b> |
| Figure S4. Correlation between anti-S (BAU/ml) and T-cell responses (SFU/10 <sup>6</sup> PMBCs)....                                                                      | 20        |
| Supplemental Methods .....                                                                                                                                               | 21        |

**Table S1. Clinical characteristics of the main cohort and subgroup of patients who had cellular responses assessed.**

| Characteristic                            |                                  | Main Cohort<br>N=920 (%) | Subgroup<br>N=106 (%) | p value           |
|-------------------------------------------|----------------------------------|--------------------------|-----------------------|-------------------|
| <b>Gender</b>                             | Male                             | 604 (65.7)               | 71 (67.0)             | 0.78              |
|                                           | Female                           | 316 (34.3)               | 35 (33.0)             |                   |
| <b>Age</b>                                | Years (Median)                   | 59 (48-67)               | 53 (42-62)            | <b>&lt;0.0001</b> |
| <b>Ethnicity</b>                          | Caucasian*                       | 404 (43.9)               | 43 (40.6)             | 0.51              |
|                                           | Black                            | 84 (9.1)                 | 14 (13.2)             |                   |
|                                           | Indoasian                        | 301 (32.7)               | 31 (29.2)             |                   |
|                                           | Other                            | 131 (14.2)               | 18 (17.0)             |                   |
| <b>Cause of ESKD</b>                      | Polycystic kidney disease        | 107 (11.6)               | 8 (7.5)               | 0.59              |
|                                           | Glomerulonephritis*              | 272 (29.6)               | 34 (32.1)             |                   |
|                                           | Diabetic nephropathy             | 171 (18.6)               | 17 (16.0)             |                   |
|                                           | Urological                       | 72 (7.8)                 | 8 (7.5)               |                   |
|                                           | Unknown                          | 208 (22.6)               | 26 (24.5)             |                   |
|                                           | Other                            | 90 (9.8)                 | 13 (12.3)             |                   |
| <b>Vaccinated ≤1 year post transplant</b> | Yes                              | 92 (10.0)                | 45 (42.5)             | <b>&lt;0.0001</b> |
|                                           | No                               | 828 (90.0)               | 61 (57.5)             |                   |
| <b>Time vaccinated post transplant</b>    | Years (Median)                   | 6.6 (6.1-7.3)            | 2.0 (0.4-7.9)         | <b>&lt;0.0001</b> |
| <b>Immunosuppression at diagnosis</b>     | CNI monotherapy*                 | 458 (49.8)               | 44 (41.5)             | 0.11              |
|                                           | CNI/anti-proliferative           | 240 (26.1)               | 30 (28.3)             |                   |
|                                           | CNI/steroids                     | 56 (6.1)                 | 2 (1.9)               |                   |
|                                           | CNI/anti-proliferatives/steroids | 149 (16.2)               | 26 (24.5)             |                   |

|                                            |                              |            |            |                   |
|--------------------------------------------|------------------------------|------------|------------|-------------------|
|                                            | Anti-proliferatives/steroids | 4 (0.4)    | -          |                   |
|                                            | Other                        | 13 (1.4)   | 4 (3.8)    |                   |
| <b>Induction immunotherapy</b>             | Alemtuzumab*                 | 636 (69.3) | 64 (60.4)  | 0.067             |
|                                            | IL2 receptor blocker         | 103 (11.2) | 30 (28.3)  |                   |
|                                            | None/Unknown                 | 181 (19.7) | 12 (11.3)  |                   |
| <b>Transplant number</b>                   | 1 <sup>st</sup>              | 806 (87.6) | 93 (87.7)  | 0.97              |
|                                            | ≥2 <sup>nd</sup>             | 114 (12.4) | 13 (12.3)  |                   |
| <b>Diabetes</b>                            | No                           | 592 (64.3) | 75 (70.8)  | 0.19              |
|                                            | Yes                          | 328 (35.7) | 31 (29.2)  |                   |
| <b>Vaccine type</b>                        | BNT162b2                     | 490 (53.3) | 51 (48.1)  | 0.32              |
|                                            | ChAdOx1                      | 430 (46.7) | 55 (51.9)  |                   |
| <b>Time between vaccinations</b>           | Days (median)                | 74 (66-77) | 63 (63-77) | <b>&lt;0.0001</b> |
| <b>Time of serological test post-boost</b> | Days (median)                | 31 (27-35) | 31 (29-34) | 0.38              |

ESKD – end stage kidney disease, CNI- calcineurin inhibitor \*Comparator

**Table S2. Demographic characteristics of HCW comparator cohort**

| <b>Characteristic</b>                      |                | <b>HCW (prior infection)<br/>n=25 (%)</b> | <b>HCW (infection-naïve)<br/>n=40 (%)</b> |
|--------------------------------------------|----------------|-------------------------------------------|-------------------------------------------|
| <b>Gender</b>                              | Male           | 11 (44.0)                                 | 15 (37.5)                                 |
|                                            | Female         | 14 (56.0)                                 | 25 (62.5)                                 |
| <b>Age</b>                                 | Years (Median) | 32.9 (26.0-47.1)                          | 42.8 (33.4-45.7)                          |
| <b>Vaccine type</b>                        | BNT162b2       | 18 (72.0)                                 | 32 (80.0)                                 |
|                                            | ChAdOx1        | 7 (28.0)                                  | 8 (20.0)                                  |
| <b>Time between vaccinations</b>           | Days (median)  | 68 (61-75)                                | 66 (61-69)                                |
| <b>Time of serological test post-boost</b> | Days (median)  | 28 (21-29)                                | 24 (21-29)                                |

**Table S3. Clinical characteristics associated with seroconversion following SARS-CoV-2 vaccination in 768 infection-naïve kidney transplant recipients**

| Characteristic                            |                                  | Failure to seroconvert<br>N=343 (%) | Seroconversion<br>N=425 (%) | p value           |
|-------------------------------------------|----------------------------------|-------------------------------------|-----------------------------|-------------------|
| <b>Gender</b>                             | Male                             | 228 (66.5)                          | 280 (65.9)                  | 0.86              |
|                                           | Female                           | 115 (33.5)                          | 145 (34.1)                  |                   |
| <b>Age</b>                                | Years (Median)                   | 60 (49-67)                          | 59 (48-67)                  | 0.30              |
| <b>Ethnicity</b>                          | Caucasian                        | 164 (47.8)                          | 200 (47.1)                  | 0.14              |
|                                           | Black                            | 31 (9.0)                            | 26 (6.1)                    |                   |
|                                           | Indoasian                        | 94 (27.4)                           | 143 (33.6)                  |                   |
|                                           | Other                            | 54 (15.7)                           | 56 (13.2)                   |                   |
| <b>Cause of ESKD</b>                      | Polycystic kidney disease        | 40 (11.7)                           | 51 (12.0)                   | 0.74              |
|                                           | Glomerulonephritis               | 106 (30.9)                          | 123 (28.9)                  |                   |
|                                           | Diabetic nephropathy             | 69 (20.1)                           | 75 (17.6)                   |                   |
|                                           | Urological                       | 27 (7.9)                            | 39 (9.2)                    |                   |
|                                           | Unknown                          | 66 (19.2)                           | 98 (23.1)                   |                   |
|                                           | Other                            | 35 (10.2)                           | 39 (9.2)                    |                   |
| <b>Vaccinated ≤1 year post transplant</b> | Yes                              | 42 (12.2)                           | 17 (4.0)                    | <b>&lt;0.0001</b> |
|                                           | No                               | 301 (87.8)                          | 408 (96.0)                  |                   |
| <b>Time vaccinated post transplant</b>    | Years (Median)                   | 6.8 (2.4-13.6)                      | 6.7 (3.2-11.9)              | 0.78              |
| <b>Immunosuppression at diagnosis</b>     | CNI monotherapy*                 | 97 (28.3)                           | 284 (66.8)                  | <b>&lt;0.0001</b> |
|                                           | CNI/anti-proliferative           | 123 (35.9)                          | 74 (17.4)                   |                   |
|                                           | CNI/steroids                     | 21 (6.1)                            | 26 (6.1)                    |                   |
|                                           | CNI/anti-proliferatives/steroids | 95 (27.7)                           | 36 (8.5)                    |                   |
|                                           | Anti-proliferatives/steroids     | 3 (0.9)                             | 1 (0.2)                     |                   |
|                                           | Other                            | 4 (1.2)                             | 4 (0.9)                     |                   |

|                                            |                                                            |                                      |                                     |                   |
|--------------------------------------------|------------------------------------------------------------|--------------------------------------|-------------------------------------|-------------------|
| <b>Induction immunotherapy</b>             | Alemtuzumab*<br>IL2 receptor blocker<br>None/Unknown/Other | 194 (56.6)<br>60 (17.5)<br>89 (25.9) | 333 (78.4)<br>23 (5.4)<br>69 (16.2) | <b>&lt;0.0001</b> |
| <b>Transplant number</b>                   | 1 <sup>st</sup><br>≥2 <sup>nd</sup>                        | 292 (85.1)<br>51 (14.9)              | 380 (89.4)<br>45 (10.6)             | 0.07              |
| <b>Diabetes</b>                            | No<br>Yes                                                  | 210 (61.2)<br>133 (38.8)             | 294 (69.2)<br>131 (30.8)            | <b>0.021</b>      |
| <b>Vaccine type</b>                        | BNT162b2<br>ChAdOx1                                        | 141 (41.1)<br>202 (58.9)             | 269 (63.3)<br>156 (36.7)            | <b>&lt;0.0001</b> |
| <b>Time between vaccinations</b>           | Days (median)                                              | 74 (66-78)                           | 75 (68-77)                          | 0.76              |
| <b>Time of serological test post-boost</b> | Days (median)                                              | 31 (27-35)                           | 31 (27-35)                          | 0.49              |

ESKD – end stage kidney disease, CNI-Calcineurin inhibitors, \*indicates comparator group

**Table S4. Comparison of clinical characteristics of infection-naïve patients receiving ChAdOx1 versus BNT162b2 vaccines**

| Characteristic                            |                                  | ChAdOx1<br>N=358 (%) | BNT162b2<br>N=410 (%) | p value       |
|-------------------------------------------|----------------------------------|----------------------|-----------------------|---------------|
| <b>Gender</b>                             | Female                           | 117 (32.7)           | 143 (34.9)            | 0.52          |
|                                           | Male                             | 241 (67.3)           | 267 (65.1)            |               |
| <b>Age</b>                                | Years (Median)                   | 59 (49-67)           | 60 (48-67)            | 0.45          |
| <b>Ethnicity</b>                          | Caucasian                        | 175 (48.9)           | 189 (46.1)            | <b>0.046</b>  |
|                                           | Black                            | 35 (9.8)             | 22 (5.4)              |               |
|                                           | Indoasian                        | 98 (27.4)            | 139 (33.9)            |               |
|                                           | Other                            | 50 (14.0)            | 60 (14.6)             |               |
| <b>Cause of ESKD</b>                      | Polycystic kidney disease        | 47 (13.1)            | 44 (10.7)             | 0.62          |
|                                           | Glomerulonephritis               | 113 (31.6)           | 116 (28.3)            |               |
|                                           | Diabetic nephropathy             | 66 (18.4)            | 78 (19.0)             |               |
|                                           | Urological                       | 26 (7.3)             | 40 (9.8)              |               |
|                                           | Unknown                          | 74 (20.7)            | 90 (22.0)             |               |
|                                           | Other                            | 32 (8.9)             | 42 (10.2)             |               |
| <b>Vaccinated ≤1 year post transplant</b> | Yes                              | 39 (10.9)            | 20 (4.9)              | <b>0.0025</b> |
|                                           | No                               | 319 (89.1)           | 390 (95.1)            |               |
| <b>Immunosuppression at diagnosis</b>     | CNI monotherapy*                 | 166 (46.4)           | 215 (56.4)            | 0.33          |
|                                           | CNI/anti-proliferative           | 94 (26.3)            | 103 (25.1)            |               |
|                                           | CNI/steroids                     | 25 (7.0)             | 22 (5.4)              |               |
|                                           | CNI/anti-proliferatives/steroids | 69 (19.3)            | 62 (15.1)             |               |
|                                           | Anti-proliferatives/steroids     | 2 (0.6)              | 2 (0.5)               |               |
|                                           | Other                            | 2 (0.6)              | 6 (1.5)               |               |
| <b>Induction immunotherapy</b>            | Alemtuzumab*                     | 235(65.6)            | 292 (71.2)            | 0.078         |
|                                           | IL2 receptor blocker             | 48 (13.4)            | 35 (8.5)              |               |



|                                            |                                     |                          |                          |                   |
|--------------------------------------------|-------------------------------------|--------------------------|--------------------------|-------------------|
|                                            | None/Unknown/Other                  | 75 (20.9)                | 83 (20.2)                |                   |
| <b>Transplant number</b>                   | 1 <sup>st</sup><br>≥2 <sup>nd</sup> | 311 (86.9)<br>47 (13.1)  | 361 (88.0)<br>49 (12.0)  | 0.62              |
| <b>Diabetes</b>                            | No<br>Yes                           | 231 (64.5)<br>127 (35.5) | 273 (66.6)<br>137 (33.4) | 0.55              |
| <b>Seroconversion</b>                      | Yes<br>No                           | 156 (43.6)<br>202 (56.4) | 269 (65.6)<br>141 (34.4) | <b>&lt;0.0001</b> |
| <b>Time between vaccinations</b>           | Days (median)                       | 74 (66-78)               | 74.5 (68-77)             | 0.95              |
| <b>Time of serological test post-boost</b> | Days (median)                       | 31 (26-34)               | 31 (28-35)               | 0.065             |

ESKD – end stage kidney disease, CNI=calcineurin inhibitors, \*indicates comparator group

**Table S5. Clinical characteristics associated with seroconversion in 358 infection-naïve patients receiving ChAdOx1**

| Variable                               | Reference Group    | Denominator | Response Rate (%) | Univariable      |         | Multivariable    |         |
|----------------------------------------|--------------------|-------------|-------------------|------------------|---------|------------------|---------|
|                                        |                    |             |                   | OR (95% CI)      | p value | OR (95% CI)      | p value |
| <b>Age</b>                             | ≥60                | 178         | 69 (38.8)         | 0.64 (0.44-1.03) | 0.068   | 0.53 (0.33-0.84) | 0.008   |
| <b>Gender</b>                          | Male               | 241         | 104 (43.2)        | 0.95 (0.61-1.48) | 0.82    |                  |         |
| <b>Ethnicity</b>                       | Caucasian          | 175         | 76 (43.4)         | 0.99 (0.65-1.50) | 0.96    |                  |         |
| <b>Cause ESRD</b>                      | Glomerulonephritis | 113         | 51 (45.1)         | 1.10 (0.70-1.72) | 0.69    |                  |         |
| <b>Time of vaccine post-transplant</b> | <1 year            | 39          | 7 (17.9)          | 0.25 (0.11-0.58) | 0.0013  | 0.23 (0.09-0.56) | 0.0012  |
| <b>Number of transplants</b>           | ≥2                 | 47          | 19 (40.4)         | 0.86 (0.46-1.61) | 0.64    |                  |         |
| <b>Transplant induction agent</b>      | Alemtuzumab        | 235         | 124 (52.8)        | 3.18 (1.97-5.12) | <0.0001 | -                |         |
| <b>Maintenance Immunosuppression</b>   | CNI monotherapy    | 166         | 104 (62.7)        | 4.52 (2.89-7.06) | <0.0001 | 4.12 (2.44-6.95) | <0.0001 |
| <b>Diabetes</b>                        | Yes                | 127         | 51 (40.2)         | 0.8 (0.52-1.25)  | 0.33    |                  |         |

CNI=calcineurin inhibitors

**Table S6. Clinical characteristics associated with seroconversion in 410 infection-naïve patients receiving BNT162b2**

| Variable                               | Reference Group    | Denominator | Response Rate (%) | Univariable      |         | Multivariable     |         |
|----------------------------------------|--------------------|-------------|-------------------|------------------|---------|-------------------|---------|
|                                        |                    |             |                   | OR (95% CI)      | p value | OR (95% CI)       | p value |
| <b>Age</b>                             | ≥60                | 208         | 134 (64.4)        | 0.90 (0.60-1.35) | 0.61    |                   |         |
| <b>Gender</b>                          | Male               | 267         | 176 (65.9)        | 1.04 (0.68-1.59) | 0.86    |                   |         |
| <b>Ethnicity</b>                       | Caucasian          | 189         | 124 (65.6)        | 0.99 (0.66-1.50) | 0.99    |                   |         |
| <b>Cause ESRD</b>                      | Glomerulonephritis | 116         | 72 (62.1)         | 0.81 (0.52-1.26) | 0.34    |                   |         |
| <b>Time of vaccine post-transplant</b> | <1 year            | 20          | 10 (50.0)         | 0.51 (0.21-1.25) | 0.14    | -                 |         |
| <b>Number of transplants</b>           | ≥2                 | 49          | 26 (53.1)         | 0.55 (0.30-1.0)  | 0.05    | -                 |         |
| <b>Transplant induction agent</b>      | Alemtuzumab        | 292         | 209 (71.6)        | 2.43 (1.57-3.79) | 0.0001  | -                 |         |
| <b>Maintenance Immunosuppression</b>   | CNI monotherapy    | 215         | 180 (83.7)        | 6.13 (3.87-9.69) | <0.0001 | 6.34 (3.71-11.06) | <0.0001 |
| <b>Diabetes</b>                        | Yes                | 137         | 80 (58.4)         | 0.62 (0.41-0.96) | 0.03    | 0.51 (0.32-0.83)  | 0.006   |

CNI=calcineurin inhibitors

**Table S7. Clinical characteristics associated with seroconversion in 768 infection-naïve patients receiving a SARS-CoV-2 vaccine**

| Variable                               | Reference Group    | Denominator | Response Rate (%) | Univariable      |         | Multivariable    |         |
|----------------------------------------|--------------------|-------------|-------------------|------------------|---------|------------------|---------|
|                                        |                    |             |                   | OR (95% CI)      | p value | OR (95% CI)      | p value |
| <b>Age</b>                             | ≥60                | 386         | 203 (52.6)        | 1.25 (0.94-1.66) | 0.12    | 0.71 (0.51-0.99) | 0.043   |
| <b>Gender</b>                          | Male               | 508         | 280 (55.1)        | 0.97 (0.72-1.32) | 0.97    |                  |         |
| <b>Ethnicity</b>                       | Caucasian          | 364         | 200 (54.9)        | 0.97 (0.73-1.29) | 0.84    |                  |         |
| <b>Cause ESRD</b>                      | Glomerulonephritis | 229         | 123 (53.7)        | 0.91 (0.67-1.24) | 0.55    |                  |         |
| <b>Time of vaccine post-transplant</b> | <1 year            | 59          | 17 (28.8)         | 0.30 (0.17-0.53) | <0.0001 | 0.30 (0.16-0.57) | 0.0002  |
| <b>Number of transplants</b>           | ≥2                 | 96          | 45 (46.9)         | 0.68 (0.44-1.04) | 0.08    | -                |         |
| <b>Transplant induction agent</b>      | Alemtuzumab        | 527         | 333 (63.2)        | 2.78 (2.03-3.82) | <0.0001 | 1.22 (0.82-1.80) | 0.32    |
| <b>Maintenance Immunosuppression</b>   | CNI monotherapy    | 381         | 284 (74.5)        | 5.11 (3.75-6.96) | <0.0001 | 5.20 (3.57-7.57) | <0.0001 |
| <b>Diabetes</b>                        | Yes                | 264         | 131 (49.6)        | 0.70 (0.52-0.94) | 0.02    | 0.65 (0.46-0.91) | 0.014   |
| <b>Vaccine</b>                         | BNT162b2           | 410         | 269 (65.6)        | 2.47 (1.85-3.31) | <0.0001 | 2.46 (1.78-3.41) | <0.0001 |

CNI - calcineurin inhibitors

**Table S8. Characteristics of infection-naïve patients undergoing assessment of serological and cellular responses by vaccine type**

| Characteristic                            |                     | BNT162b2<br>N=40 (%) | ChAdOx1<br>N=39 (%) | p value           |
|-------------------------------------------|---------------------|----------------------|---------------------|-------------------|
| <b>Gender</b>                             | Male                | 30 (75.0)            | 25 (64.1)           | 0.30              |
|                                           | Female              | 10 (25.0)            | 14 (35.9)           |                   |
| <b>Age</b>                                | Years (Median)      | 57 (46-64)           | 50 (39-56)          | <b>0.016</b>      |
| <b>Ethnicity</b>                          | Caucasian           | 18 (45.0)            | 19 (48.7)           | 0.30              |
|                                           | Black               | 2 (5.0)              | 6 (15.4)            |                   |
|                                           | Indoasian           | 14 (35.0)            | 8 (20.5)            |                   |
|                                           | Other               | 6 (15.0)             | 6 (15.4)            |                   |
| <b>Cause of ESKD</b>                      | Glomerulonephritis* | 10 (25.0)            | 16 (41.0)           | <b>0.026</b>      |
|                                           | Other               | 30 (75.0)            | 23 (59.0)           |                   |
| <b>Vaccinated ≤1 year post transplant</b> | Yes                 | 3 (7.5)              | 25 (64.1)           | <b>&lt;0.0001</b> |
|                                           | No                  | 37 (92.5)            | 14 (35.9)           |                   |
| <b>Immunosuppression at diagnosis</b>     | CNI monotherapy*    | 21 (52.5)            | 10 (25.6)           | <b>0.015</b>      |
|                                           | Other               | 19 (47.5)            | 29 (74.4)           |                   |
| <b>Induction immunotherapy</b>            | Alemtuzumab         | 29 (72.5)            | 16 (41.0)           | <b>0.0005</b>     |
|                                           | Other               | 11 (27.5)            | 23 (59.0)           |                   |
| <b>Transplant number</b>                  | 1 <sup>st</sup>     | 36 (90.0)            | 33 (84.6)           | 0.47              |
|                                           | ≥2 <sup>nd</sup>    | 4 (10.0)             | 6 (15.4)            |                   |
| <b>Diabetes</b>                           | No                  | 23 (57.5)            | 32 (82.1)           | <b>0.018</b>      |
|                                           | Yes                 | 17 (42.5)            | 7 (17.9)            |                   |

ESKD – end stage kidney disease, CNI - calcineurin inhibitors

**Table S9. Analysis of clinical characteristics associated with detectable T-cell responses in infection-naïve patients after the first-year post-transplant**

Nine of 79 (11.4%) infection-naïve patients had detectable T-cell responses post-vaccination, none of the 28 patients vaccinated within the first-year post-transplant and 9/51 (17.6%) of patients vaccinated after the first post-operative year,  $p=0.019$ . Analysis was performed of independent variables associated with T-cell responses in infection-naïve patients after the first-year post-transplant.

| Variable                      | Reference Group    | Univariable      |         |
|-------------------------------|--------------------|------------------|---------|
|                               |                    | OR (95% CI)      | p value |
| Age                           | ≥60 years          | 0.23 (0.03-1.98) | 0.18    |
| Gender                        | Male               | 0.50 (0.11-2.19) | 0.36    |
| Cause of ESKD                 | Glomerulonephritis | 1.41 (0.30-6.62) | 0.66    |
| Number of transplants         | ≥2                 | 0.93 (0.09-9.03) | 0.95    |
| Transplant induction agent    | Alemtuzumab        | 1.75 (0.32-9.55) | 0.52    |
| Maintenance Immunosuppression | CNI monotherapy    | 0.17 (0.19-3.78) | 0.17    |
| Vaccine                       | BNT1262b2          | 1.40 (0.25-7.72) | 0.70    |
| Diabetes                      | Yes                | 1.3 (0.30-5.57)  | 0.72    |

**Table S10. Characteristics associated with lack of detectable immunological (serological and T-cell) response in 79 infection-naïve transplant patients**

| Variable                               | Reference Group    | Denominator | Event rate (%) | Univariable        |         | Multivariable     |         |
|----------------------------------------|--------------------|-------------|----------------|--------------------|---------|-------------------|---------|
|                                        |                    |             |                | OR (95% CI)        | p value | OR (95% CI)       | p value |
| <b>Age</b>                             | ≥60                | 23          | 10 (43.5)      | 0.95 (0.36-2.54)   | 0.92    |                   |         |
| <b>Gender</b>                          | Male               | 55          | 25 (45.5)      | 1.17 (0.44-3.08)   | 0.76    |                   |         |
| <b>Ethnicity</b>                       | Caucasian          | 37          | 16 (43.2)      | 0.92 (0.38-2.25)   | 0.86    |                   |         |
| <b>Cause ESKD</b>                      | Glomerulonephritis | 26          | 8 (30.8)       | 0.43 (0.16-1.15)   | 0.09    | -                 |         |
| <b>Time of vaccine post-transplant</b> | <1 year            | 28          | 5 (17.9)       | 0.15 (0.5-0.46)    | 0.0009  | 0.19 (0.04-0.96)  | 0.045   |
| <b>Number of transplants</b>           | ≥2                 | 10          | 4 (40.0)       | 0.82 (0.21-3.16)   | 0.77    |                   |         |
| <b>Transplant induction agent</b>      | Alemtuzumab        | 45          | 27 (60.0)      | 4.88 (1.87-13.79)  | 0.0017  | 1.89 (0.49-7.35)  | 0.30    |
| <b>Maintenance Immunosuppression</b>   | CNI monotherapy    | 31          | 25 (80.6)      | 15.83 (5.11-49.06) | <0.0001 | 13.3 (3.68-48.14) | <0.0001 |
| <b>Diabetes</b>                        | Yes                | 24          | 11 (45.8)      | 1.09 (0.42-2.87)   | 0.86    |                   |         |
| <b>Vaccine</b>                         | BNT162b2           | 40          | 25 (62.5)      | 4.83 (1.85-12.65)  | 0.0013  | 1.63 (0.42-6.55)  | 0.46    |

CNI - calcineurin inhibitors

**Figure S1. Correlation between anti-S concentrations and clinical characteristics in infection-naïve patients.**

- a. Kidney transplant patients who were receiving calcineurin inhibitor (CNI) monotherapy had significantly higher anti-S concentrations, 75 (7.1-646) BAU/ml, compared with patients receiving CNI in combination with anti-proliferative agents (mycophenolate mofetil or azathioprine), with or without corticosteroids, 7.1 (7.1-28) BAU/ml,  $p < 0.0001$
- b. Comparing patients receiving combination therapy alone, there was no difference between those who had received Alemtuzumab induction, 7.1 (7.1-67) BAU/ml compared with IL-2 receptor antibodies, 7.1 (7.1-7.12) BAU/ml,  $p = 0.06$ . Comparing patients who received Alemtuzumab as induction alone, those who are maintained on CNI monotherapy, 73 (7.1-656) BAU/ml, had significantly higher anti-S than those on combination therapy,  $p < 0.0001$ .
- c. There was no difference in anti-S between females, 17 (7.1-264) BAU/ml compared with males, 11 (7.1-223) BAU/ml,  $p = 0.76$
- d. There was no correlation between cause of end stage kidney disease (ESKD) and anti-S concentrations. Patients with ESKD secondary to diabetes had a median anti-S concentration of 9 (7.1-174) BAU/ml, polycystic kidney disease (APKD), 18 (7.1-415) BAU/ml, Glomerulonephritis (GN), 9 (7.1-238), Urological causes of ESKD, 14 (7.1-205) BAU/ml, and unknown causes of ESKD, 15 (7.1-221) BAU/ml,  $p = 0.83$
- e. There was no correlation between ethnicity and anti-S concentrations. Patients from Indoasian, Black and White backgrounds having a median anti-S concentration of 19 (7.1-272), 7.1 (7.1-51) and 13 (7.1-270) respectively,  $p = 0.13$ .
- f. Patients who were within their first-year post-transplant when vaccinated had significantly lower anti-S, 7.1 (7.1-21) BAU/ml compared with those patients who were vaccinated after the 1<sup>st</sup> year, 17 (7.1-271) BAU/ml,  $p < 0.0001$ .
- g. A significant inverse correlation was seen between anti-S response and age in patients who received BNT162b2,  $r = -0.14$ ,  $p = 0.0038$  (i), but not in patients who received ChAdOx1,  $r = -0.08$ ,  $p = 0.13$  (ii).



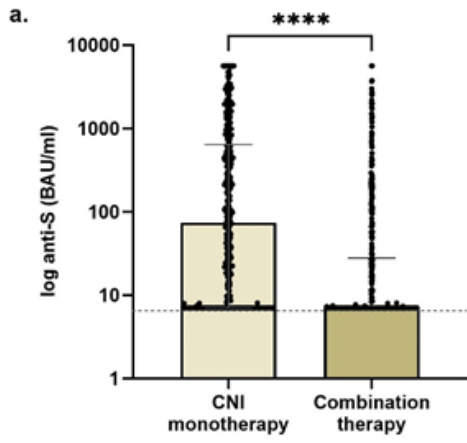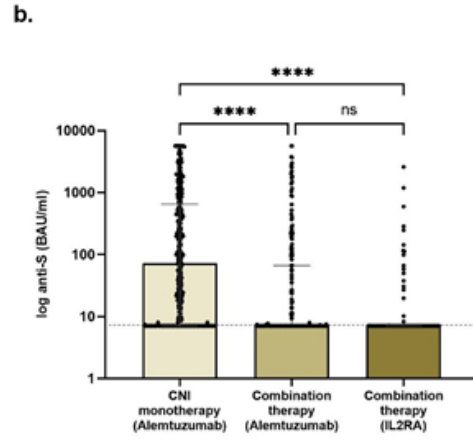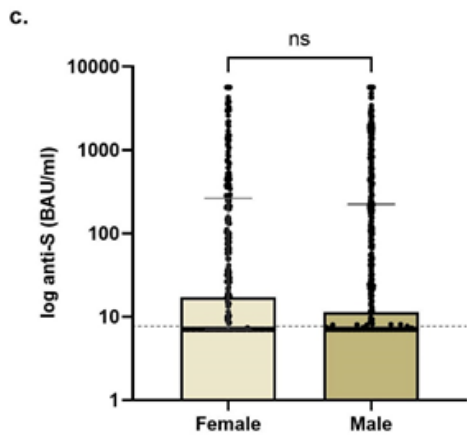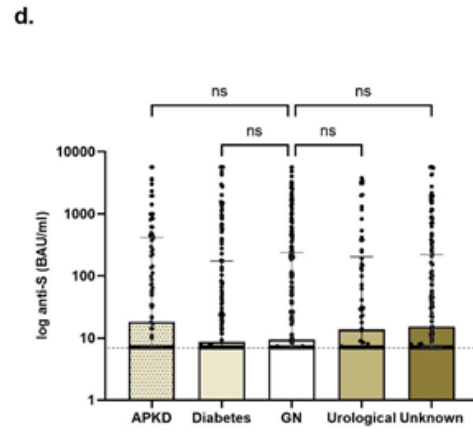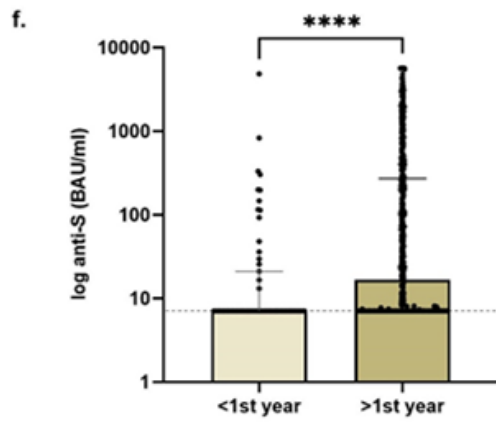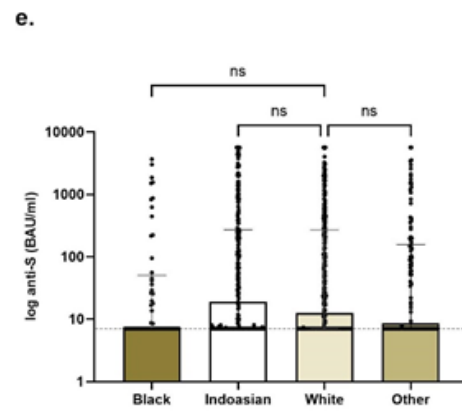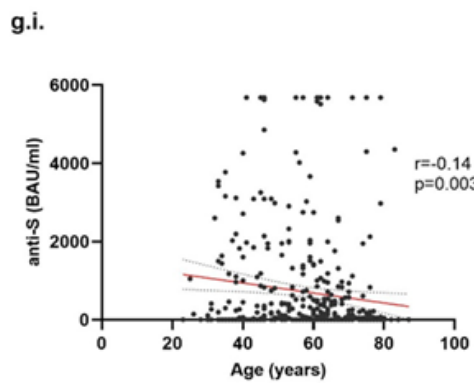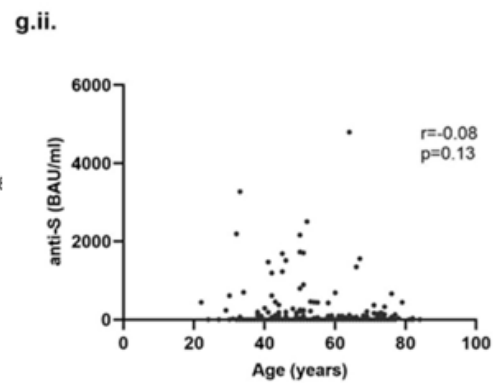

**Figure S2. Correlation between anti-S concentrations and diagnostic characteristics in patients with prior infection.**

- a. Anti-S concentrations in patients who were diagnosed by PCR compared with serology were 324 (111-844) and 758 (172-1985) BAU/ml respectively,  $p=0.59$ , in patients receiving ChAdOx1; and 1659 (546-3684) and 2752 (641-5680) BAU/ml respectively,  $p=0.76$ , in patients receiving BNT162b2.
- b. Anti-S concentrations in patients who were anti-NP positive compared with negative at the time of testing, were 503 (37-2094) and 701 (153-1694) BAU/ml respectively,  $p=0.91$ , in patients receiving ChAdOx1; and 2512 (499-5680) and 2350 (780-5022) BAU/ml respectively,  $p=0.99$ , in patients receiving BNT162b2

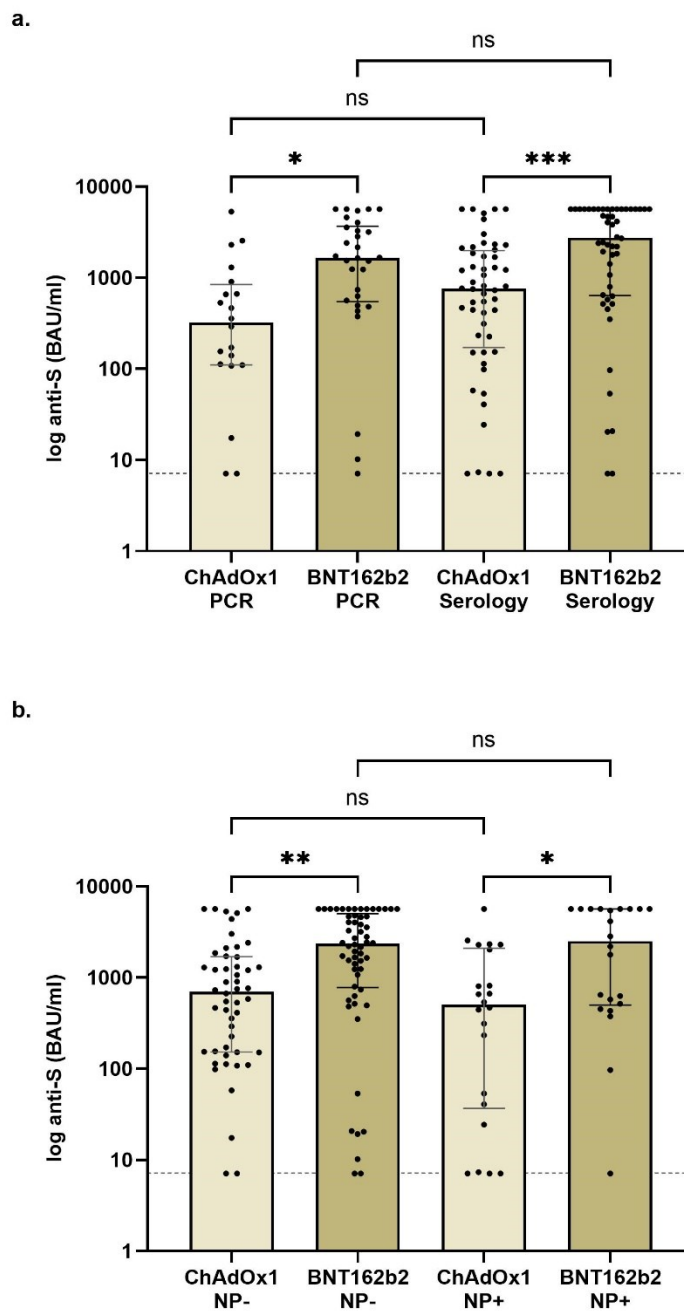

**Figure S3. Immunological responses to SARS-CoV-2 vaccination in 106 kidney transplant recipients who underwent paired serological and T cell assessments**

- a. Anti-S concentrations in infection-naïve patients who received BNT162b2 were higher compared with those patients who had received ChAdOx1, with anti-S concentrations of 34 (7.1-861) BAU/ml and 7.1 (7.1-13) BAU/ml respectively,  $p=0.0005$ . These anti-S concentrations in patients were significantly lower than infection naïve HCW who received the corresponding vaccine, with HCW receiving BNT162b2 and ChAdOx1 having a median anti-S of 815 (318-2033),  $p=0.0003$ , and 88 (47-395) BAU/ml,  $p=0.01$ , respectively. Black dotted line represents 7.1 BAU/ml, the cut off for a positive result.
- b. There was no difference in median SFU/ $10^6$  PBMCs in previously exposed patients who received BNT162b2 compared with ChAdOX1, with 160 (20-422) SFU/ $10^6$  PBMCs and 95 (8-144) SFU/ $10^6$  PBMCs respectively,  $p=0.42$ . There were no differences between T-cell responses in previously exposed patients and HCW receiving the corresponding vaccine, with HCW receiving BNT162b2 and ChAdOx1 having a median 246 (131-332) SFU/ $10^6$  PBMCs,  $p=0.63$  and 114 (74-216) SFU/ $10^6$  PBMCs,  $p=0.85$  respectively. Data points of 0 SFU/ $10^6$  PBMCs are represented as 0.1 for visualisation on a log scale. Black dotted line indicates threshold for a positive ELISpot, 40 SFU/ $10^6$  PBMCs which was calculated from unvaccinated, infection naïve HCW.
- c. There was no difference in anti-S concentrations in patients with prior infection who received BNT162b2, 1238 (497-2829) BAU/ml, compared with ChAdOx1, 366 (119-1273) BAU/ml,  $p=0.07$ . There were also no differences between patients and HCW with prior exposure who received BNT162b2, median anti-S 2189 (1236-3303) BAU/ml,  $p=0.72$ , or HCW who received ChAdOx1, median anti-S 753 (574-867) BAU/ml,  $p=0.91$ . Black dotted line represents 7.1 BAU/ml, the cut off for a positive result.

a.

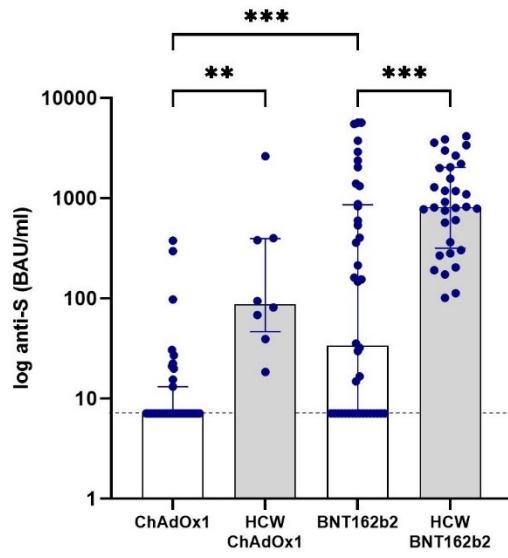

b.

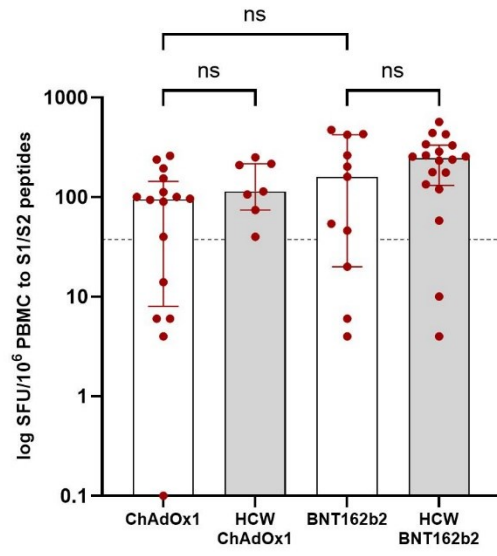

c.

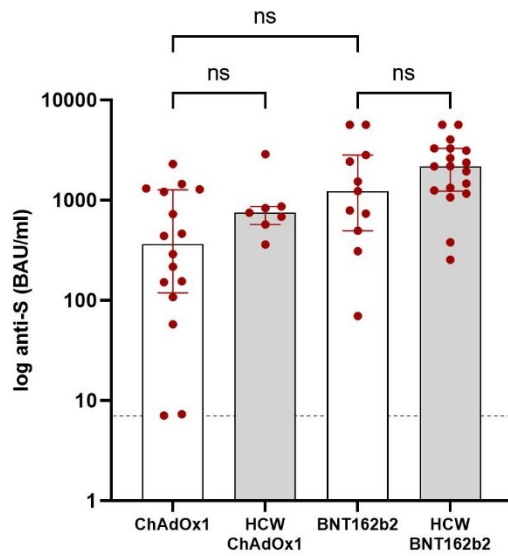

Figure S4. Correlation between anti-S (BAU/ml) and T-cell responses (SFU/10<sup>6</sup> PMBCs)

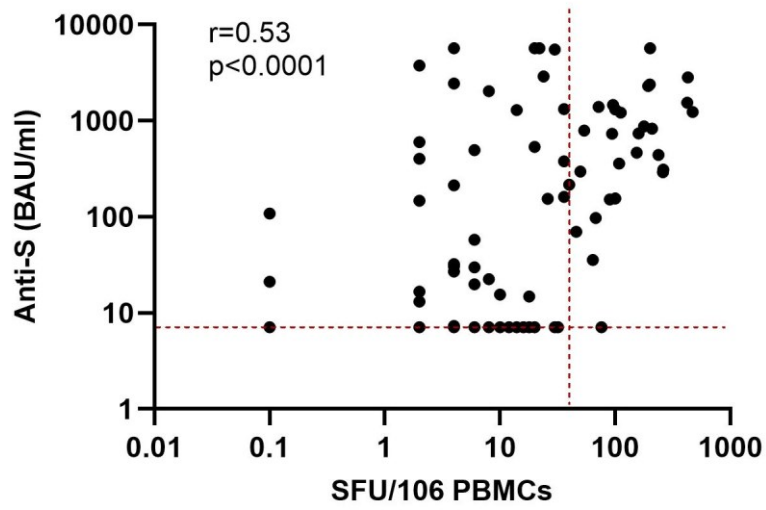

## 1 **Supplemental Methods**

### 3 ***Study population and objectives***

4 We undertook a cohort study of 920 kidney transplant patients who had received 2 doses of either  
5 BNT162b2 or ChAdOx1. The aim of the study was to evaluate immune responses to 2 dose vaccination  
6 with either BNT162b2 or ChAdOx1. Patients were included if they were able to provide consent for  
7 research and were participating in the vaccination programme. Participants were vaccinated as part of  
8 their usual care, with two doses of either 0.5mL ChAdOx1-S (Oxford AstraZeneca) or 30ug BNT162b2  
9 (Pfizer-BioNTech) at the specified dosing interval.

10 All patients were recruited from within Imperial College Renal and Transplant Centre into one of two  
11 prospective studies. The first is the OCTAVE study, an Observational Cohort Study of T-cells,  
12 Antibodies and Vaccine Efficacy in SARS-CoV-2 in people with chronic diseases and/or secondary  
13 immunodeficiency, which is part of the UK COVID-19 Immunity National Core Study Programme.  
14 The OCTAVE study was approved by the Health Research Authority, Research Ethics Committee  
15 (Reference:21/HRA/0489). The second study is a prospective longitudinal study ‘The effect of COVID-  
16 19 on Renal and Immunosuppressed patients’, sponsored by Imperial College London. This study was  
17 approved by the Health Research Authority, Research Ethics Committee (Reference: 20/WA/0123).

18 A subgroup of the first 106 (11.5%) patients recruited underwent more in-depth immunological analysis  
19 of serological and cellular responses to SARS-CoV2 vaccination. A group of 65 healthcare workers  
20 (HCW), with a median age of 38 (30-46) years, were used as a comparator. Fifty and 15 HCW received  
21 the BNT162b2 and ChAdOx1 vaccines, respectively. The median interval between vaccinations in the  
22 HCW was 68 (61-70) days, with a median time to sampling post-vaccination of 28 (21-28) days.

23 Anonymised data were collected on age, gender, ethnicity, primary renal disease, diabetes, induction  
24 and maintenance immunosuppression, date(s) and number of renal transplants. Under the terms of our  
25 ethical approval for healthy volunteers data were collected only on age, gender and ethnicity.

### 27 ***Serological testing***

28 Serum was tested for antibodies to both the nucleocapsid protein (anti-NP) and spike protein (anti-S).  
29 Anti-NP was tested using the Abbott Architect SARS-CoV-2 IgG 2 step chemiluminescent  
30 immunoassay (CMIA) according to manufacturer’s instructions. This is a non-quantitative assay and  
31 samples were interpreted as positive or negative with a threshold index value of 1.4. The presence of  
32 anti-NP was used as a marker of natural infection. For vaccine responses, spike protein antibodies (anti-  
33 S IgG) were assessed using the Abbott Architect SARS-CoV-2 IgG Quant II CMIA. Anti-S antibody  
34 titres are quantitative with a threshold value of 7.1 BAU/ml for positivity, and an upper level of  
35 detection of 5680 BAU/ml.

### 37 ***T cell ELISpot***

38 SARS-CoV-2 specific T-cell responses were detected using the T-SPOT® Discovery SARS-CoV-2  
39 (Oxford Immunotec) according to the manufacturer's instructions. In brief, peripheral blood  
40 mononuclear cells (PBMCs) were isolated from whole blood samples with the addition of T-Cell  
41 Xtend™ (Oxford Immunotec) if samples were taken more than 12 hours prior to processing. All samples  
42 were processed within 24 hours of venepuncture. 250,000 PBMCs were plated into individual wells of  
43 a T-SPOT® Discovery SARS-CoV-2 plate. The assay measures immune responses to SARS-CoV-2  
44 spike protein peptide pools (S1 protein and S2 protein), in addition to positive PHA  
45 (phytohemagglutinin) and negative controls. Cells were incubated and interferon- $\gamma$  secreting T cells  
46 were detected. Spot forming units (SFU) were detected using an automated plate reader (Autoimmun  
47 Diagnostika). Spot count in the negative well was subtracted from spot count for spike protein wells  
48 and this was used to calculate spike protein specific responses per  $10^6$  PBMC. Assays with a negative  
49 PHA response were deemed to be failed assays and excluded from analysis (n=1 for HCW and n=2 for  
50 transplant recipients). Infection-naïve, unvaccinated participants were used to identify a threshold for a  
51 positive response using mean +3 standard deviation SFU/ $10^6$  PBMC, as previously described. This  
52 resulted in a cut-off for positivity of 40 SFU/ $10^6$  PBMC (1).

53

#### 54 ***Definition of prior infection***

55 Prior infection was defined serologically or via past PCR positive confirmed infection. The detection  
56 of anti-NP on current or historic samples, and the presence of anti-S at baseline (pre-vaccine) or historic  
57 samples, was required for the definition of prior infection by serological methods. Serological screening  
58 of transplant patients had commenced in our centre in June 2020, and these data were used to aid  
59 identification of patients with prior SARS-CoV-2 exposure prior to vaccination. As part of this  
60 protocol, patients were initially screened for anti-NP, and those with a subthreshold anti-NP index value  
61 (0.25-1.4), underwent confirmatory testing for natural infection by assessing for receptor binding  
62 domain (anti-RBD) antibodies. This was performed using an in-house double binding antigen ELISA  
63 (Imperial Hybrid DABA; Imperial College London, London, UK), which detects total RBD antibodies  
64 (2-4). The HCW had serological analysis at baseline, which was used to define prior infection alone.

65

#### 66 ***Statistical Analysis***

67 Statistical analysis was conducted using Prism 9.0 (GraphPad Software Inc., San Diego, California).  
68 Unless otherwise stated, all data are reported as median with interquartile range (IQR). The aim of the  
69 study was to investigate the seroconversion rates in transplant patients receiving either BNT162b2 or  
70 ChAdOx, and identify clinical variables associated with **reduced** immunogenicity. In addition, T-cell  
71 responses were investigated in a subcohort of patients.

72

73 The Chi-squared test was used for proportional assessments; seroconversion and ELISpot positivity in  
74 patients receiving BNT162b2 and ChAdOx1 in both infection-naïve and infection-experienced patients.

75 The Mann-Whitney and Kruskal-Wallis tests were used to assess the difference between 2 or >2 groups,  
76 with Dunn's post-hoc test to compare individual groups. A comparison of anti-S concentrations and T-  
77 cell responses, in both infection naïve and infection-experienced patients receiving BNT162b2 and  
78 ChAdOx1 was undertaken.

79  
80 To investigate clinical features associated with seroconversion following vaccination, proportional  
81 assessments of clinical characteristics in patients seroconverting compared with those failing to  
82 seroconvert was performed. A comparative analysis of clinical features associated with seroconversion  
83 by vaccine type was undertaken. Multivariable analysis was carried out using multiple logistic  
84 regression using variables which had a p value of <0.15 on univariable analysis.

85

### 86 ***Acknowledgements and Funding***

87 The OCTAVE trial, which is part of the COVID-19 Immunity National Core Study Programme, was  
88 sponsored by the University of Birmingham and funded by a grant from UK Research and Innovation  
89 (UKRI) administered by the Medical Research Council (grant reference number MC\_PC\_20031). It has  
90 been designated an Urgent Public Health (UPH) study by the National Institute of Health Research.

91 This research is also supported by the National Institute for Health Research (NIHR) Biomedical  
92 Research Centre based at Imperial College Healthcare NHS Trust and Imperial College London. The  
93 authors would like to thank the West London Kidney Patient Association, all the patients and staff at  
94 ICHNT (The Imperial COVID vaccine group and dialysis staff, and staff within the North West London  
95 Pathology laboratories). The authors are also grateful for support from Hari and Rachna Murgai, Milan  
96 and Rishi Khosla OBE, The Nan Diamond Fund, Sidharth and Indira Burman, and the Auchy Charitable  
97 Foundation. MP is supported by an NIHR clinical lectureship. Work in DCT's lab is supported by a  
98 Wellcome Trust Clinical Career Development Fellowship

99

### 100 ***Role of the funding source***

101 The funding body had no role in data collection, analysis, interpretation, writing of the manuscript or  
102 the decision to submit for publication

103

### 104 ***Data sharing***

105 Individual participant data that underlie the results reported in this article, after de-identification will  
106 be shared upon reasonable request to the corresponding author

107

### 108 ***Contributor statement***

109 MP- Investigation, data curation, data analysis, writing - original draft, review, and editing,  
110 conceptualisation, accessed and verified data

111 TT- Investigation, data curation, writing-review and editing



112 CC- Investigation, data analysis, writing-review and editing, conceptualisation, accessed and verified  
113 data  
114 PMa, SG, RDC, HE, PMo, SMcI, DM, AC, GP- Investigation, writing-review and editing  
115 LL- Writing-review and editing, supervision  
116 DT- Writing-review and editing, supervision  
117 SPM- Writing-review and editing, supervision, conceptualisation  
118 PK- Investigation, writing - original draft, review, and editing, conceptualisation  
119 MW- Investigation, data curation, data analysis, writing - original draft, review, and editing,  
120 conceptualisation, accessed and verified data  
121

122 The corresponding authors had full access to all the data and the final decision to submit for  
123 publication.  
124

125 **Imperial Renal COVID-19 vaccine study group**

126 Shanice Lewis<sup>1</sup>, Jaid Debrah<sup>2</sup>, Amar Thind<sup>1,3</sup>, Jack Beadle<sup>1,3</sup>, Katie Tansey<sup>3</sup>, Frank Dor<sup>3</sup>, Anand  
127 Muthasamy<sup>3</sup>, Paul Herbert<sup>3</sup>, Dawn Goodall<sup>3</sup>, Marina Loucaidou<sup>3</sup>, Rawya Charif<sup>3</sup>, Rachna Bedi<sup>3</sup>

128 **OCTAVE Study Group**

129 Pamela Kearns<sup>4,5</sup>, Stefan Siebert<sup>6</sup>, Charlotte Gaskell<sup>4</sup>, Amanda Kirkham<sup>4</sup>, Sarah Pirrie<sup>4</sup>, Sarah  
130 Bowden<sup>4</sup>, Sophia Magwaro<sup>4</sup>, Ana Hughes<sup>4</sup>, Zixiang Lim<sup>7,8</sup>, Stavros Dimitriadis<sup>8</sup>, Sam M. Murray<sup>8</sup>,  
131 Thomas Marjot<sup>7,8</sup>, Zay Win<sup>8</sup>, Sophie L. Irwin<sup>8</sup>, Georgina Meacham<sup>8</sup>, Alex G. Ritcher<sup>10</sup>, Jack  
132 Satsangi<sup>8</sup>, Paul Miller<sup>9</sup>, Daniel Rea<sup>3,10</sup>, Gordon Cook<sup>11</sup>, Lance Turtle<sup>12</sup>, Paul Klenerman<sup>7,8</sup>, Susanna J.  
133 Dunachie<sup>8</sup>, Neil Basu<sup>6</sup>, Thushan I. de Silva<sup>13</sup>, Eleanor Barnes<sup>7,8</sup>, Carl S. Goodyear<sup>6</sup>, Iain McInnes<sup>6</sup>

134 <sup>1</sup>Centre for Inflammatory Disease, Department of Immunology and Inflammation, Imperial College  
135 London, Hammersmith Campus, Du Cane Road, London W12 0NN.

136 <sup>2</sup>Department of Infection and Immunity Sciences Northwest London Pathology NHS Trust, Charing  
137 Cross Hospital, Fulham Palace Road W6 6RF

138 <sup>3</sup>Imperial College Renal and Transplant Centre, Imperial College Healthcare NHS Trust,  
139 Hammersmith Hospital, London, W12 0HS

140 <sup>4</sup> Cancer Research UK Clinical Trials Unit (CRCTU), University of Birmingham, Edgbaston,  
141 Birmingham. B15 2TT, UK.

142 <sup>5</sup> National Institute for Health Research (NIHR) Birmingham Biomedical Research Centre, University  
143 Hospitals Birmingham NHS Foundation Trust. Birmingham, UK.

144 <sup>6</sup> University of Glasgow, Glasgow, G12 8QQ, UK.

145 <sup>7</sup> Oxford University Hospital NHS Trust, Oxford, OX3 9DU

146 <sup>8</sup> Nuffield Department of Medicine, University of Oxford, Oxford. OX1 3SY, UK.

147 <sup>9</sup> St George's Hospital, London. SW17 0QT, UK.

148 <sup>10</sup> University Hospitals Birmingham NHS Foundation Trust, Queen Elizabeth Hospital, Birmingham.  
149 B15 2TH, UK.

150 <sup>11</sup> Leeds Institute of Clinical Trials Research, University of Leeds, Leeds. LS2 9JF, UK.

151 <sup>12</sup> HPRU in Emerging and Zoonotic Infections Institute of Infection, Veterinary and Ecological  
152 Sciences, University of Liverpool

153

154

155 1. Predecki M, Clarke C, Brown J, Cox A, Gleeson S, Guckian M, et al. Effect of previous SARS-  
156 CoV-2 infection on humoral and T-cell responses to single-dose BNT162b2 vaccine. *Lancet* (London,  
157 England). 2021;397(10280):1178-81.

158 2. Rosadas C, Randell P, Khan M, McClure MO, Tedder RS. Testing for responses to the wrong  
159 SARS-CoV-2 antigen? *Lancet*. 2020;396(10252):e23.

160 3. Predecki M, Clarke C, Gleeson S, Greathead L, Santos E, McLean A, et al. Detection of SARS-  
161 CoV-2 Antibodies in Kidney Transplant Recipients. *J Am Soc Nephrol*. 2020;31(12):2753-6.

162 4. Clarke C, Predecki M, Dhutia A, Ali MA, Sajjad H, Shivakumar O, et al. High Prevalence of  
163 Asymptomatic COVID-19 Infection in Hemodialysis Patients Detected Using Serologic Screening. *J Am*  
164 *Soc Nephrol*. 2020;31(9):1969-75.

165
